# Supplementary material for: Comparison of traditional culture and molecular qPCR for detection of simultaneous carriage of multiple pneumococcal serotypes in African children
Source: PubMed Central journal article supplement (PMC5498530; doi:10.1038/s41598-017-04915-y), 2017-07-05
Supplement: 41598_2017_4915_MOESM1_ESM.pdf [file 41598_2017_4915_MOESM1_ESM.pdf]

**Comparison of traditional culture and molecular qPCR for detection of simultaneous carriage of multiple pneumococcal serotypes in African children**

**Courtney P. Olwagen<sup>1,2</sup>, Peter V. Adrian<sup>1,2</sup>, and Shabir A. Madhi<sup>1,2,3\*</sup>**

<sup>1</sup>Department of Science and Technology/National Research Foundation: Vaccine Preventable Diseases, University of the Witwatersrand, Faculty of Health Sciences, Johannesburg, South Africa.

<sup>2</sup>Medical Research Council: Respiratory and Meningeal Pathogens Research Unit, University of the Witwatersrand, Faculty of Health Sciences, Johannesburg, South Africa.

<sup>3</sup>National Institute for Communicable Diseases: a division of National Health Laboratory Service, Johannesburg, South Africa.

**Supplementary table S1: Performance of the quantitative real-time PCR assay**

| <b>Bacterial target</b>                               | <b>Efficiency (%)</b> | <b>Correlation coefficient (r<sup>2</sup>)</b> | <b>Limit of detection (copies/PCR)</b> | <b>Intra-assay variation</b> | <b>Accuracy</b> | <b>Inter-assay variation</b> |
|-------------------------------------------------------|-----------------------|------------------------------------------------|----------------------------------------|------------------------------|-----------------|------------------------------|
| <i>Streptococcus pneumoniae</i> (lytA)                | 97                    | 0.99                                           | 10                                     | 0.02                         | 0.043           | 0.025                        |
| <i>Streptococcus pneumoniae</i> serotype 1            | 105                   | 0.99                                           | 10                                     | 0.011                        | 0.025           | 0.032                        |
| <i>Streptococcus pneumoniae</i> serotype 3            | 94                    | 0.99                                           | 10                                     | 0.025                        | -0.013          | 0.025                        |
| <i>Streptococcus pneumoniae</i> serotype 4            | 91                    | 0.99                                           | 10                                     | 0.074                        | -0.01           | 0.015                        |
| <i>Streptococcus pneumoniae</i> serotype 5            | 95                    | 0.99                                           | 100                                    | 0.018                        | 0.048           | 0.047                        |
| <i>Streptococcus pneumoniae</i> serogroup 6A/B/C/D    | 97                    | 0.99                                           | 100                                    | 0.013                        | -0.26           | 0.023                        |
| <i>Streptococcus pneumoniae</i> serogroup 6C/D        | 92                    | 0.99                                           | 10                                     | 0.011                        | -0.078          | 0.041                        |
| <i>Streptococcus pneumoniae</i> serotype 7C           | 102                   | 0.99                                           | 10                                     | 0.008                        | -0.076          | 0.041                        |
| <i>Streptococcus pneumoniae</i> serogroup 9A/L/N/V    | 97                    | 0.99                                           | 10                                     | 0.019                        | -0.059          | 0.023                        |
| <i>Streptococcus pneumoniae</i> serotype 10A/B        | 91                    | 0.99                                           | 10                                     | 0.006                        | 0.001           | 0.008                        |
| <i>Streptococcus pneumoniae</i> serogroup 11A/B/C/D/F | 98                    | 0.99                                           | 10                                     | 0.027                        | 0.023           | 0.053                        |
| <i>Streptococcus pneumoniae</i> serogroup 12A/B/F     | 94                    | 0.99                                           | 10                                     | 0.018                        | 0.068           | 0.009                        |
| <i>Streptococcus pneumoniae</i> serotype 13           | 94                    | 0.99                                           | 10                                     | 0.003                        | -0.023          | 0.003                        |
| <i>Streptococcus pneumoniae</i> serotype 14           | 91                    | 0.99                                           | 100                                    | 0.078                        | -0.041          | 0.056                        |
| <i>Streptococcus pneumoniae</i> serogroup 15A/B/C/F   | 98                    | 0.99                                           | 10                                     | 0.056                        | -0.059          | 0.038                        |
| <i>Streptococcus pneumoniae</i> serogroup 16F         | 92                    | 0.99                                           | 10                                     | 0.03                         | -0.013          | 0.029                        |
| <i>Streptococcus pneumoniae</i> serotype 17F          | 99                    | 0.99                                           | 10                                     | 0.054                        | -0.026          | 0.018                        |
| <i>Streptococcus pneumoniae</i> serogroup 18A/B/C     | 91                    | 0.99                                           | 10                                     | 0.023                        | 0.021           | 0.047                        |
| <i>Streptococcus pneumoniae</i> serotype 19A          | 92                    | 0.99                                           | 10                                     | 0.001                        | 0.054           | 0.005                        |
| <i>Streptococcus pneumoniae</i> serogroup 19B/F       | 93                    | 0.99                                           | 10                                     | 0.006                        | 0.001           | 0.003                        |
| <i>Streptococcus pneumoniae</i> serotype 20           | 102                   | 0.99                                           | 10                                     | 0.015                        | 0.054           | 0.05                         |
| <i>Streptococcus pneumoniae</i> serotype 21           | 101                   | 0.99                                           | 10                                     | 0.098                        | 0.075           | 0.11                         |
| <i>Streptococcus pneumoniae</i> serogroup 23A/B/F     | 96                    | 0.99                                           | 10                                     | 0.013                        | -0.056          | 0.021                        |
| <i>Streptococcus pneumoniae</i> serotype 23F          | 90                    | 0.99                                           | 100                                    | 0.002                        | -0.073          | 0.038                        |
| <i>Streptococcus pneumoniae</i> serogroup 34/37/17A   | 92                    | 0.99                                           | 10                                     | 0.002                        | 0.09            | 0.013                        |



**Supplementary table S3:** Detection of overall pneumococcal carriage by culture, stratified by colonization density measured by quantitative PCR (qPCR)

| <b>Density (CFU/ml)</b>            | <b>Number culture positive/ number in density category by PCR (%)</b> |
|------------------------------------|-----------------------------------------------------------------------|
| Undetected                         | 8/67 (12)                                                             |
| 0-10 <sup>2</sup>                  | 1/4 (25)                                                              |
| > 10 <sup>2</sup> -10 <sup>3</sup> | 22/37 (59)                                                            |
| >10 <sup>3</sup> -10 <sup>4</sup>  | 64/81 (79)                                                            |
| >10 <sup>4</sup> -10 <sup>5</sup>  | 85/97 (88)                                                            |
| >10 <sup>5</sup> -10 <sup>6</sup>  | 65/67 (97)                                                            |
| >10 <sup>6</sup> -10 <sup>7</sup>  | 18/18 (100)                                                           |
| >10 <sup>7</sup> -10 <sup>8</sup>  | 3/3 (100)                                                             |
| <b>Total</b>                       | <b>266/374 (71)</b>                                                   |

CFU/ml, colony forming units per millimetre as measured by qPCR. Values are number culture positive/number in density category by qPCR (%).

**Supplementary table S4:** Yield of culture and molecular qPCR for the detection of *Streptococcus pneumoniae* serotypes/groups, including for those specific serotypes which were individually identifiable on qPCR in nasopharyngeal swabs (n = 374)

|             | All serotypes/serogroups |          |       |                 |                              | Serotypes individually identifiable by qPCR |          |       |                 |                              |
|-------------|--------------------------|----------|-------|-----------------|------------------------------|---------------------------------------------|----------|-------|-----------------|------------------------------|
|             | qPCR (-)                 | qPCR (+) | Total | <i>p</i> -value | Concordance ( <i>kappa</i> ) | qPCR (-)                                    | qPCR (+) | Total | <i>p</i> -value | Concordance ( <i>kappa</i> ) |
| Culture (+) | 239                      | 21       | 260   |                 |                              | 86                                          | 11       | 97    |                 |                              |
| Culture (-) | 150                      | 8566     | 8562  | <0.001          | 0.73                         | 69                                          | 5070     | 4985  | <0.001          | 0.68                         |
| Total       | 389                      | 8586     | 8976  |                 |                              | 155                                         | 5080     | 5236  |                 |                              |

**Supplementary table S5: Detection of pneumococcal serotypes by culture and quantitative PCR (qPCR)**

| Serotype    | Culture  | Total (N=374) |         |             |             |
|-------------|----------|---------------|---------|-------------|-------------|
|             |          | qPCR          | p-value | sensitivity | specificity |
| 1           | 0        | 3(0.8)        | 0.08    | 0           | 100         |
| 3           | 4(1.1)   | 5(1.4)        | 0.56    | 60          | 99.8        |
| 4           | 1(0.3)   | 3(0.8)        | 0.16    | 33.3        | 100         |
| 5           | 0        | 23(6.1)       | <0.001  | 0           | 100         |
| 6A/B        | 54(14.4) | 55(14.7)      | 0.99    | 93          | 99          |
| A           | 19(5.1)  | -             | -       | -           | -           |
| B           | 35(9.4)  | -             | -       | -           | -           |
| 6C/D        | 1(0.3)   | 5(1.3)        | 0.046   | 20          | 100         |
| C           | 1(0.3)   | -             | -       | -           | -           |
| D           | 0        | -             | -       | -           | -           |
| 7C          | 1(0.3)   | 2(1)          | 0.32    | 50          | 100         |
| 9A/L/N/V    | 15(4)    | 40(10.7)      | <0.001  | 35          | 99.7        |
| A           | 0        | -             | -       | -           | -           |
| L           | 0        | -             | -       | -           | -           |
| N           | 2(0.53)  | -             | -       | -           | -           |
| V           | 14(3.7)  | -             | -       | -           | -           |
| 10A         | 1(0.3)   | 4(1.1)        | 0.08    | 25          | 100         |
| 11A/B/C/D/F | 4(1.1)   | 13(3.5)       | 0.003   | 31          | 100         |
| A           | 4(1.1)   | -             | -       | -           | -           |
| B           | 0        | -             | -       | -           | -           |
| C           | 0        | -             | -       | -           | -           |
| D           | 0        | -             | -       | -           | -           |
| F           | 0        | -             | -       | -           | 100         |
| 12A/B/F     | 0        | 0             | -       | -           | -           |
| A           | 0        | -             | -       | -           | -           |
| B           | 0        | -             | -       | -           | -           |
| F           | 0        | -             | -       | -           | -           |
| 13          | 1(0.3)   | 8(2.1)        | 0.008   | 12.5        | 100         |
| 14          | 18(4.8)  | 26(7)         | 0.01    | 65.4        | 99.7        |
| 15A/B/C/F   | 14(3.7)  | 18(4.8)       | 0.16    | 66.7        | 99.4        |
| A           | 3(0.8)   | -             | -       | -           | -           |
| B           | 9(2.4)   | -             | -       | -           | -           |
| C           | 2(0.5)   | -             | -       | -           | -           |
| F           | 0        | -             | -       | -           | -           |
| 16F         | 7(1.9)   | 8(2.1)        | 0.32    | 87.5        | 100         |
| 17F         | 2(0.53)  | 3(0.8)        | 0.56    | 33.3        | 99.7        |
| 18A/B/C     | 9(2.4)   | 17(4.5)       | 0.01    | 47.1        | 99.7        |
| A           | 1(0.3)   | -             | -       | -           | -           |
| B           | 0        | -             | -       | -           | -           |
| C           | 8(2.1)   | -             | -       | -           | -           |
| F           | 0        | -             | -       | -           | -           |
| 19A         | 10(2.7)  | 14(3.7)       | 0.1     | 64.3        | 99.7        |
| 19B/F       | 57(21.9) | 70(18.7)      | 0.034   | 81.4        | 100         |
| B           | 5(0.8)   | -             | -       | -           | -           |
| F           | 52(20)   | -             | -       | -           | -           |
| 20          | 3(0.8)   | 2(0.53)       | 0.32    | 100         | 99.7        |
| 21          | 5(0.8)   | 4(1.1)        | 0.32    | 100         | 99.7        |
| 23AB        | 5(0.8)   | 8(2.1)        | 0.32    | 25          | 99.2        |
| A           | 3(0.8)   | -             | -       | -           | -           |
| B           | 2(0.53)  | -             | -       | -           | -           |
| 23F         | 44(11.8) | 50(13.4)      | 0.13    | 78          | 98.5        |
| 34/37/17F   | 4(1.1)   | 8(2.1)        | 0.046   | 50          | 100         |
| 34          | 4(1.1)   | -             | -       | -           | -           |
| 37          | 0        | -             | -       | -           | -           |
| 17A         | 0        | -             | -       | -           | -           |

**Supplementary table S6:** Detection of pneumococcal serotype carriage by culture, stratified by colonization density measured by quantitative PCR (qPCR)

| Pneumococcal density by qPCR (CFU/ml) | Number of culture positive/number in density category by qPCR (%) |             |            |            |              |             |              |             |            |             |              |            |
|---------------------------------------|-------------------------------------------------------------------|-------------|------------|------------|--------------|-------------|--------------|-------------|------------|-------------|--------------|------------|
|                                       | 1                                                                 | 3           | 4          | 5          | 6A/B         | 6C/D        | 7C           | 9A/L/N/V    | 10A        | 11A/B/C/D/F | 12A/B/F      | 13         |
| Undetected                            | 0/371                                                             | 1/369(0.3)  | 0/371      | 0/351      | 3/319(0.9)   | 0/369       | 0/372        | 1/333(0.3)  | 0/370      | 0/361       | 0/374        | 0/366      |
| 0- 10 <sup>2</sup>                    | 0                                                                 | 0           | 0/1        | 0          | 0            | 0           | 0/1          | 0/19        | 0          | 0/7         | 0            | 0          |
| > 10 <sup>2</sup> -10 <sup>3</sup>    | 0/2                                                               | 0/1         | 0/1        | 0/23       | 7/7(100)     | 0/2         | 0            | 1/8(13)     | 0          | 0/2         | 0            | 0/5        |
| >10 <sup>3</sup> -10 <sup>4</sup>     | 0                                                                 | 1/1(100)    | 1/1(100)   | 0          | 12/16(100)   | 0/2         | 1/1(100)     | 7/7(100)    | 0/1        | 2/2(100)    | 0            | 0/1        |
| >10 <sup>4</sup> -10 <sup>5</sup>     | 0/1                                                               | 1/2(50)     | 0          | 0          | 18/18(100)   | 0           | 0            | 5/6(83)     | 1/1(100)   | 2/2(100)    | 0            | 0/1        |
| >10 <sup>5</sup> -10 <sup>6</sup>     | 0                                                                 | 1/1(100)    | 0          | 0          | 9/9(100)     | 0           | 0            | 1/1(100)    | 0/2        | 0           | 0            | 0          |
| >10 <sup>6</sup> -10 <sup>7</sup>     | 0                                                                 | 0           | 0          | 0          | 5/5(100)     | 1/1(100)    | 0            | 0           | 0          | 0           | 0            | 1/1(100)   |
| >10 <sup>7</sup> -10 <sup>8</sup>     | 0                                                                 | 0           | 0          | 0          | 0            | 0           | 0            | 0           | 0          | 0           | 0            | 0          |
| >10 <sup>8</sup>                      | 0                                                                 | 0           | 0          | 0          | 0            | 0           | 0            | 0           | 0          | 0           | 0            | 0          |
| Total                                 | 0/374                                                             | 4/374(1.1)  | 1/374(0.3) | 0/374      | 54/374(14.4) | 1/374(0.3)  | 1/374(0.3)   | 15/374(0.3) | 1/374(0.3) | 4/374(1.1)  | 0/374        | 1/374(0.3) |
| Pneumococcal density by qPCR (CFU/ml) | 14                                                                | 15A/B/C/F   | 16F        | 17F        | 18A/B/C      | 19A         | 19B/F        | 20          | 21         | 23A/B       | 23F          | 34/37/17A  |
|                                       | Undetected                                                        | 1/348(0.9)  | 2/356(0.6) | 0/366      | 1/371(0.3)   | 1/357(0.3)  | 1/360(0.3)   | 0/304       | 1/372(0.3) | 1/370(0.3)  | 3/365(0.8)   | 5/324(1.5) |
| 0- 10 <sup>2</sup>                    | 0                                                                 | 0           | 0          | 0/1        | 0/1          | 0/2         | 10/12(83.3)  | 0           | 0          | 0           | 0            | 1/2(50)    |
| > 10 <sup>2</sup> -10 <sup>3</sup>    | 2/11(18)                                                          | 1/3(33.3)   | 3/3(100)   | 0/1        | 1/7(14.3)    | 1/3(33.3)   | 8/12(66.7)   | 0           | 2/2(100)   | 2/8(25)     | 17/26(65.4)  | 1/4(25)    |
| >10 <sup>3</sup> -10 <sup>4</sup>     | 10/10(100)                                                        | 5/9(55.6)   | 3/3(100)   | 1/1(100)   | 4/5(80)      | 8/9(88.9)   | 21/23(91.3)  | 0           | 0          | 0/1         | 15/16(93.8)  | 1/1(100)   |
| >10 <sup>4</sup> -10 <sup>5</sup>     | 4/4(100)                                                          | 6/6(100)    | 0/1        | 0          | 3/4(75)      | 0           | 15/18(83.3)  | 2/2(100)    | 0          | 0           | 7/8(87.5)    | 1/1(100)   |
| >10 <sup>5</sup> -10 <sup>6</sup>     | 1/1(100)                                                          | 0           | 0          | 0          | 0            | 0           | 3/4(75)      | 0           | 2/2(100)   | 0           | 0            | 0          |
| >10 <sup>6</sup> -10 <sup>7</sup>     | 0                                                                 | 0           | 0          | 0          | 0            | 0           | 1/1(100)     | 0           | 0          | 0           | 0            | 0          |
| >10 <sup>7</sup> -10 <sup>8</sup>     | 0                                                                 | 0           | 1/1(100)   | 0          | 0            | 0           | 0            | 0           | 0          | 0           | 0            | 0          |
| >10 <sup>8</sup>                      | 0                                                                 | 0           | 0          | 0          | 0            | 0           | 0            | 0           | 0          | 0           | 0            | 0          |
| Total                                 | 18/374(4.8)                                                       | 14/374(3.7) | 7/374(1.9) | 2/374(0.5) | 9/374(2.4)   | 10/374(2.7) | 58/374(15.5) | 3/374(0.8)  | 5/374(1.3) | 5/374(1.3)  | 44/374(13.4) | 4/374(1.1) |

**Supplementary table S7:** Yield of additional serotypes detected by quantitative PCR (qPCR) in relation to being co-carriage with other pneumococcal serotypes

| Serotype/group | Number of serotypes co-carried/additional serotypes detected by qPCR (%) | Number of dominating colonizing serotype/number of serotypes co-carried (%) <sup>*</sup> |
|----------------|--------------------------------------------------------------------------|------------------------------------------------------------------------------------------|
| 1              | 2/3(75)                                                                  | 1/2(50)                                                                                  |
| 3              | 2/2(100)                                                                 | 2/2(100)                                                                                 |
| 4              | 2/2(100)                                                                 | 0/2                                                                                      |
| 5              | 23/23(100)                                                               | 1/23(4.3)                                                                                |
| 6A/B           | 3/4(75)                                                                  | 2/3(66.7)                                                                                |
| 6C/D           | 4/4(100)                                                                 | 0/4                                                                                      |
| 7C             | 0/1                                                                      | 0                                                                                        |
| 9A/L/N/V       | 19/26(73)                                                                | 0/19                                                                                     |
| 10A            | 2/3(75)                                                                  | 1/2(50)                                                                                  |
| 11A/B/C/D/F    | 7/9(77.8)                                                                | 2/7(28.6)                                                                                |
| 12A/B/F        | 0                                                                        | 0                                                                                        |
| 13             | 6/7(85.7)                                                                | 0/6                                                                                      |
| 14             | 7/9(77.8)                                                                | 1/7(14.3)                                                                                |
| 15A/B/C/F      | 5/6(83.3)                                                                | 1/5(25)                                                                                  |
| 16F            | 0/1                                                                      | 0                                                                                        |
| 17F            | 1/2(50)                                                                  | 0/1                                                                                      |
| 18A/B/C        | 7/9(77.8)                                                                | 1/7(14.3)                                                                                |
| 19A            | 3/5(60)                                                                  | 0/3                                                                                      |
| 19B/F          | 12/13(92.3)                                                              | 2/12(16.7)                                                                               |
| 20             | 0                                                                        | 0                                                                                        |
| 21             | 0                                                                        | 0                                                                                        |
| 23A/B          | 5/6(83.3)                                                                | 1/5(20)                                                                                  |
| 23F            | 6/11(54.5)                                                               | 0/8                                                                                      |
| 34/37/17A      | 1/4(25)                                                                  | 0/1                                                                                      |
| <b>Total</b>   | <b>117/150</b>                                                           | <b>15/117(12.8)</b>                                                                      |

<sup>\*</sup>Density of pneumococcal carriage was used to determine if the additional serotypes detected only by quantitative PCR (qPCR) were dominant colonizing serotypes (highest density colonizer).



**Supplementary table S8:** Primers and probe sequences for the qPCR detection of pneumococcal serotypes

| Primers/Probe <sup>a</sup> name                | Sequence (5' - 3')                                                                                      | serotype/serogroup                                  | Source                     |
|------------------------------------------------|---------------------------------------------------------------------------------------------------------|-----------------------------------------------------|----------------------------|
| lytA-Fwd<br>lytA-Rev<br>lytA-Probe             | TCTTACGCAATCTAGCAGATGAAGC<br>GTTGTTTGGTTGGTTATTCGTGC<br>(VIC)-TTTGCCGAAAACGCTTGATACAGGG-(MGB)           | <i>Streptococcus pneumoniae</i>                     | McAvin <i>et al</i> , 2001 |
| 1-Fwd<br>1-Rev<br>1-Probe                      | CGTGCGGTAATTGAAGCTATGA<br>TGTGGCCCCAGCAACTCT<br>(FAM)-TGCTTGCCCTTGTATAGGGT-(MGB)                        | <i>Streptococcus pneumoniae</i> _serotype 1         | Azzari <i>et al</i> , 2010 |
| 3-Fwd<br>3-Rev<br>3-Probe                      | GGTCAGCAGAAAGTATGCATTGG<br>TCGTTTATCCAGGGTCTGATGA<br>(VIC)-TATTGGATGTGGTTTATCGTGAAGA-(MGB)              | <i>Streptococcus pneumoniae</i> _serotype 3         | Azzari <i>et al</i> , 2010 |
| 4-Fwd<br>4-Rev<br>4-Probe                      | TGGGATGACATTTCTACGCACTA<br>CCGTCGCTGATGCTTTATCA<br>(FAM)-TCCTATTGGATGGTTAGTTGGTGA-(MGB)                 | <i>Streptococcus pneumoniae</i> _serotype 4         | Azzari <i>et al</i> , 2010 |
| 5-Fwd<br>5-Rev<br>5-Probe                      | TTACGGGAGTATCTTATGTCTTTAATGG<br>CAGCATTCCAGTAGCCTAAAAGTAGA<br>(VIC)-TTGTCTCAGCAACTCTATTTGGCTGTGGG-(MGB) | <i>Streptococcus pneumoniae</i> _serotype 5         | Azzari <i>et al</i> , 2010 |
| 6A/B/C/D-Fwd<br>6A/B/C/D-Rev<br>6A/B/C/D-Probe | AAGTTTGCCTAGAGTATGGGAAGGT<br>ACATTATGTCCRTGTCTTCGATACAAG<br>(VIC)-TGTTCTGCCCTGAGCAACTGG-(MGB)           | <i>Streptococcus pneumoniae</i> _serogroup 6A/B/C/D | Azzari <i>et al</i> , 2010 |
| 6C/D-Fwd<br>6C/D-Rev<br>6C/D-Probe             | TTGGGATGATTGGTCGTATTAG<br>CTCTTCAATTAGTTCTTCAGTTCG<br>(FAM)-CCACGCAATTCGCCATC-(MGB)                     | <i>Streptococcus pneumoniae</i> _serogroup 6C/D     | Azzari <i>et al</i> , 2010 |
| 7C-Fwd<br>7C-Rev<br>7C-Probe                   | CGTCAGGAATAGGTGCAATCTCT<br>TGAAATTCCAAGCGAAGCAA<br>(VIC)-TTCATCTATTGGTTCTTATGGTGTT-(MGB)                | <i>Streptococcus pneumoniae</i> _serotype 7C        | This Study                 |
| 9A/L/N/V-Fwd<br>9A/L/N/V-Rev<br>9A/L/N/V-Probe | TGGAATGGGCAAAGGGTAGTA<br>TCGGTTCCCAAGATTTTCTC<br>(FAM)-TTAATCATGCTAACGGCTCATCGA-(MGB)                   | <i>Streptococcus pneumoniae</i> _serogroup 9A/L/N/V | Azzari <i>et al</i> , 2010 |
| 10A/B-Fwd<br>10A/B-Rev                         | CCTCTCCTATCAACTATTACTCATTATACTACCT<br>AATAACCATAAGTCCCTAGATCATTCAAAG                                    | <i>Streptococcus pneumoniae</i> _serotype 10A/B     | Azzari <i>et al</i> , 2010 |

|                   |                                                |                                                        |                             |
|-------------------|------------------------------------------------|--------------------------------------------------------|-----------------------------|
| 10A/B-Probe       | (VIC)-TCATTACAACCTCCCTATGTGACACGGGTCTTTT-(MGB) |                                                        |                             |
| 11A/B/C/D/F-Fwd   | ACCGCATTTCCTTATCGCACTATATT                     | <i>Streptococcus pneumoniae</i> _serogroup 11A/B/C/D/F | This Study                  |
| 11A/B/C/D/F-Rev   | TCTCCTTACCATCAAACATGTTAATCA                    |                                                        |                             |
| 11A/B/C/D/F-Probe | (FAM)-TGAATCAGTCTGACCGTTT-(MGB)                |                                                        |                             |
| 12A/B/F-Fwd       | GATTATTCGCTTGCCTCTTCATG                        | <i>Streptococcus pneumoniae</i> _serogroup 12A/B/F     | Azzari <i>et al</i> , 2010* |
| 12A/B/F-Rev       | ATAGCCGAAATAAGCTTTCCAGAA                       |                                                        |                             |
| 12A/B/F-Probe     | (FAM)-ATTTGTAAGCGGACGTGCGATT-(MGB)             |                                                        |                             |
| 13-Fwd            | TCGGATTTAGTAGTAACCCCATTTGA                     | <i>Streptococcus pneumoniae</i> _serotype 13           | This Study                  |
| 13-Rev            | TTCTTGATTGAGGATGCATTTCC                        |                                                        |                             |
| 13-Probe          | (VIC)-AGTAGTAAGAGATCATATTCAAG-(MGB)            |                                                        |                             |
| 14-Fwd            | CGACTGAAATGTCCTAGGAGAAGAT                      | <i>Streptococcus pneumoniae</i> _serotype 14           | Azzari <i>et al</i> , 2010  |
| 14-Rev            | AATACAGTCCATCAATTACTGCAATACTC                  |                                                        |                             |
| 14-Probe          | (VIC)-TGTCATTCGTTTGCCAATACTTGATGGTCTC-(MGB)    |                                                        |                             |
| 15A/B/C/F-Fwd     | TTGAATCAGGTAGATTGATTTCTGCTA                    | <i>Streptococcus pneumoniae</i> _serogroup 15A/B/C/F   | Azzari <i>et al</i> , 2010  |
| 15A/B/C/F-Rev     | CTCTAGGAATCAAATACTGAGTCCTAATGA                 |                                                        |                             |
| 15A/B/C/F-Probe   | (FAM)-CTCCGGCTTTTGTCTTCTCTGT-(MGB)             |                                                        |                             |
| 16F-Fwd           | GCAACTGGTATTTTTGATATTGGAGAA                    | <i>Streptococcus pneumoniae</i> _serotype 16F          | This Study                  |
| 16F-Rev           | CAAAGGAATGCCATGCCATA                           |                                                        |                             |
| 16F-Probe         | (NED)-AAAATGCTAACTTCGTTGGAGG-(MGB)             |                                                        |                             |
| 17F-Fwd           | GTAAAGATTTTCATGTCCTATAAGGGAGAA                 | <i>Streptococcus pneumoniae</i> _serotype 17F          | This Study                  |
| 17F-Rev           | AGGCGTCCCTGTTTATGAGAAG                         |                                                        |                             |
| 17F-Probe         | (FAM)-TTGTACATGGTCTGGATTT-(MGB)                |                                                        |                             |
| 18A/B/C-Fwd       | CCTGTTGTTATTCACGCCTTACG                        | <i>Streptococcus pneumoniae</i> _serogroup 18A/B/C     | Azzari <i>et al</i> , 2010  |
| 18A/B/C-Rev       | TTGCACTTCTCGAATAGCCTTACTC                      |                                                        |                             |
| 18A/B/C-Probe     | (FAM)-AACCGTTGGCCCTTGTGGTGGGA-(MGB)            |                                                        |                             |
| 19A-Fwd           | TTCGACGACGTATCAGCTTCA                          | <i>Streptococcus pneumoniae</i> _serotype 19A          | Azzari <i>et al</i> , 2010  |
| 19A-Rev           | TCATTGAGAGCCTTAACCTCTTCA                       |                                                        |                             |
| 19A-Probe         | (VIC)-ACCCAAAACGGTTGACGCATTATACT-(MGB)         |                                                        |                             |
| 19B/F-Fwd         | GGTCATGCGAGATACGACAGAA                         | <i>Streptococcus pneumoniae</i> _serogroup 19B/F       | Azzari <i>et al</i> , 2010  |
| 19B/F-Rev         | TCCTCATCAGTCCCAACCAATT                         |                                                        |                             |
| 19B/F-Probe       | (VIC)-ACCTGAAGGAGTAGCTGCTGGAACGTTG-(MGB)       |                                                        |                             |

|                 |                                         |                                                      |                            |
|-----------------|-----------------------------------------|------------------------------------------------------|----------------------------|
| 20-Fwd          | AAAGATACTGGCTGAGGAGCTATCTATT            | <i>Streptococcus pneumoniae</i> _serotype 20         | Azzari <i>et al</i> , 2010 |
| 20-Rev          | AGTCAAAAGTACTCAACCATTCTGATATATTC        |                                                      |                            |
| 20-Probe        | (VIC)-AGGATAAGGTCTACTTTGTGGGAGTTC-(MGB) |                                                      |                            |
| 21-Fwd          | CCATTTGAAGGACCAGTTGTTG                  | <i>Streptococcus pneumoniae</i> _serotype 21         | This Study                 |
| 21-Rev          | AAAAAGCCACTATCAGGAATACCAA               |                                                      |                            |
| 21-Probe        | (FAM)-AATGGCATTGCTTCGTAAA-(MGB)         |                                                      |                            |
| 23A/B/F-Fwd     | GGTGGACTTTCCGATGCAA                     | <i>Streptococcus pneumoniae</i> _serogroup 23A/B/F   | This Study                 |
| 23A/B/F-Rev     | CACTGTCAACAAAAATGAGGTAATCTC             |                                                      |                            |
| 23A/B/F-Probe   | (VIC)-AAATGTCCGTATAGATAAAG-(MGB)        |                                                      |                            |
| 23F-Fwd         | TGCTATTTGCGATCCTGTTCAT                  | <i>Streptococcus pneumoniae</i> _serotype 23F        | Azzari <i>et al</i> , 2010 |
| 23F-Rev         | AGAGCCTCCGTTGTTTCGTAAA                  |                                                      |                            |
| 23F-Probe       | (FAM)-TTTCTCCGCATCAAACGTTAAG-(MGB)      |                                                      |                            |
| 34/37/17A-Fwd   | GGATACTATGTACGAACAGATGGACTTG            | <i>Streptococcus pneumoniae</i> _serogroup 34/37/17A | This Study                 |
| 34/37/17A-Rev   | CTCACTAACTCGCCCGAATAAAC                 |                                                      |                            |
| 34/37/17A-Probe | (FAM)-CCGACTATACTCCATTTGA-(MGB)         |                                                      |                            |

---

Probe<sup>a</sup>: minor groove binding (MGB) dye labelled TaqMan probe. \* probe sequence modified.

**Supplementary table S9: Primer/probe duplex combinations**

| <b>Primmer/probe combinations</b> | <b>Duplex reaction</b> |
|-----------------------------------|------------------------|
| 5 & 21                            | A                      |
| 20 & 23F                          | B                      |
| 4 & 14                            | C                      |
| 3 & 17F                           | D                      |
| 1 & 23A/B/F                       | E                      |
| 6A/B/C/D & 6C/D                   | F                      |
| 10A/B & 15A/B/C/F                 | G                      |
| 13 & 9A/L/N/V                     | H                      |
| 19A & 18A/B/C                     | I                      |
| 19B/F & 12A/B/F                   | J                      |
| 11A/B/C/D/F & 16F                 | K                      |
| 7C & 34/37/17A                    | L                      |
